# Supplementary material for: Phylogenetic Implications of Mitogenomic Sequences and Gene Rearrangements of Scale Insects (Hemiptera, Coccoidea)
Source: MDPI journal article supplement (doi:10.3390/insects14030257), 2023-03-05
Supplement: s1 [file s1]

*Callitettix braconoides*  
*Japanagallia spinosa*  
*Lycorma delicatula*  
*Platyleura kaempferi*  
*Cacopsylla coccinea*  
*Diaphorina citri*  
*Paratrioza sinica*  
*Aleurocanthus camelliae*  
*Aleurochiton aceris*  
*Aleurodicus dugesii*  
*Bemisia afer*  
*Neomaskellia andropogonis*  
*Trialeurodes vaporariorum*  
*Aclerda takahashii*  
*Albotachaedina sinensis*  
*Antecercococcus sp*  
*Apiomorpha munita*  
*Ceroplastes floridensis*  
*Ceroplastes japonicus*  
*Didesmococcus koreanus*  
*Eriococcus coriaceus*  
*Nipponaclerda biwakoensis*  
*Parasaissetia nigra*  
*Phenacoccus manihoti*  
*Saissetia coffeae*  
*Acyrtosiphon pisum*  
*Aphis citricidus*  
*Aphis craccivora*  
*Aphis gossypii*  
*Cavariella salicicola*  
*Cervaphis quercus*  
*Diuraphis noxia*  
*Eriosoma lanigerum*  
*Hormaphis betulae*  
*Melaphis rhois*  
*Mindarus keteleerifoliae*  
*Myzus persicae*  
*Schizaphis graminum*  
*Schlechtendalia chinensis*  
*Sitobion avenae*

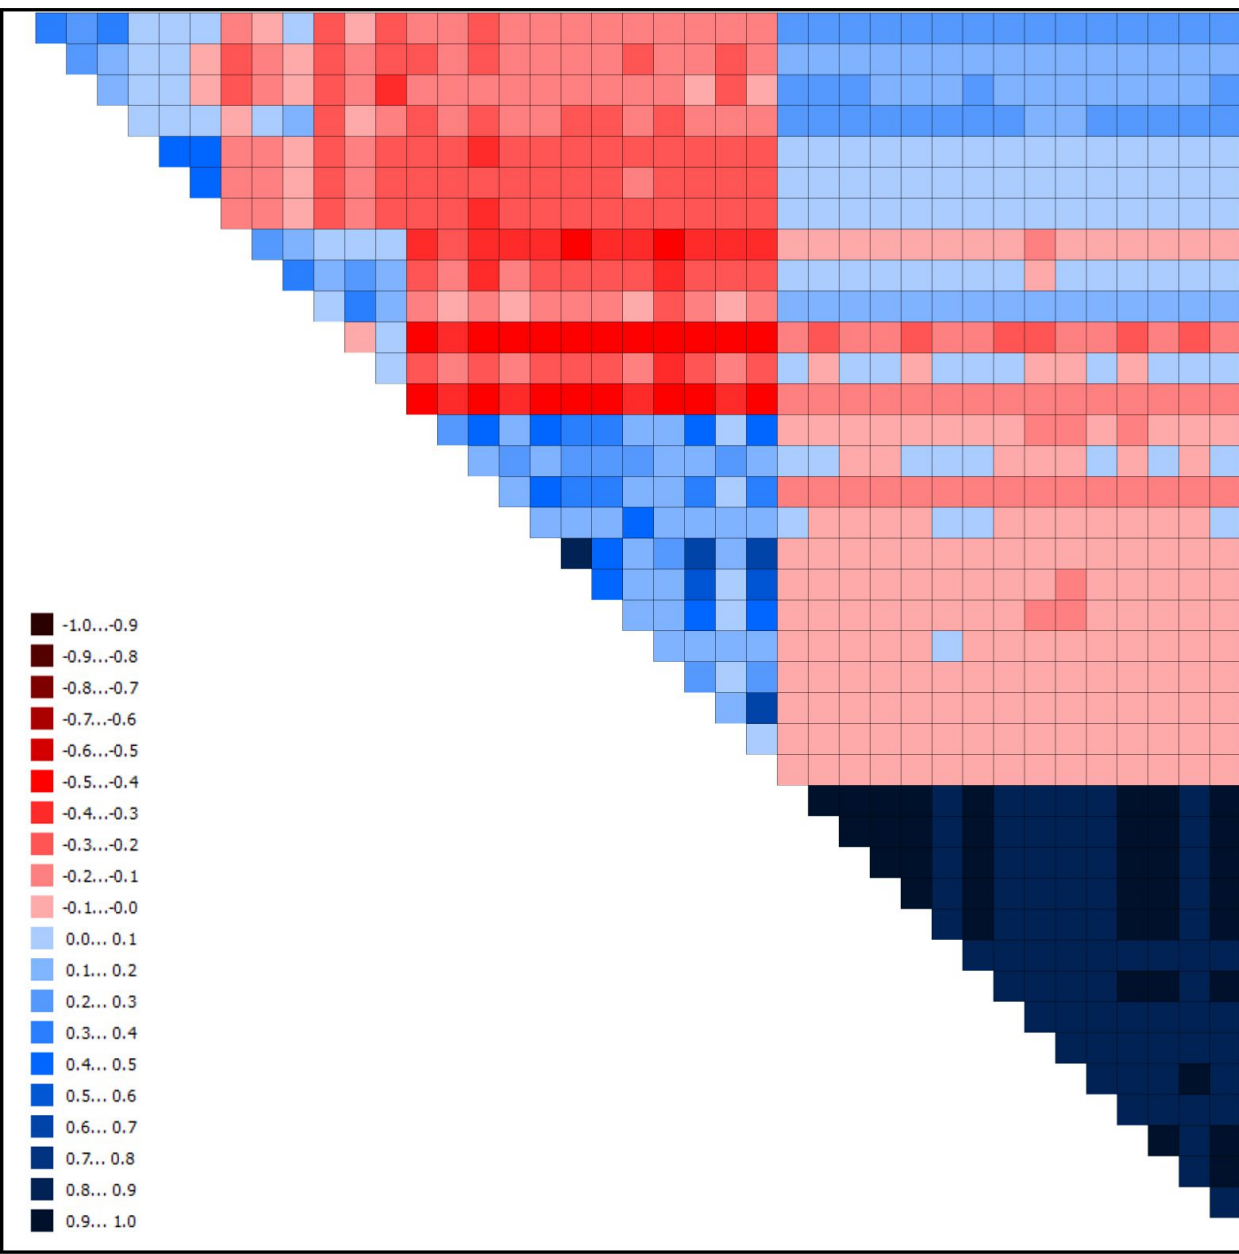

*Callitettix braconoides*  
*Japanagallia spinosa*  
*Lycorma delicatula*  
*Platyleura kaempferi*  
*Cacopsylla coccinea*  
*Diaphorina citri*  
*Paratrioza sinica*  
*Aleurocanthus camelliae*  
*Aleurochiton aceris*  
*Aleurodicus dugesii*  
*Bemisia afer*  
*Neomaskellia andropogonis*  
*Trialeurodes vaporariorum*  
*Aclerda takahashii*  
*Albotachaedina sinensis*  
*Antecercococcus sp*  
*Apiomorpha munita*  
*Ceroplastes floridensis*  
*Ceroplastes japonicus*  
*Didesmococcus koreanus*  
*Eriococcus coriaceus*  
*Nipponaclerda biwakoensis*  
*Parasaissetia nigra*  
*Phenacoccus manihoti*  
*Saissetia coffeae*  
*Acyrtosiphon pisum*  
*Aphis citricidus*  
*Aphis craccivora*  
*Aphis gossypii*  
*Cavariella salicicola*  
*Cervaphis quercus*  
*Diuraphis noxia*  
*Eriosoma lanigerum*  
*Hormaphis betulae*  
*Melaphis rhois*  
*Mindarus keteleerifoliae*  
*Myzus persicae*  
*Schizaphis graminum*  
*Schlechtendalia chinensis*  
*Sitobion avenae*
